# Supplementary material for: A novel prognostic signature based on immune-related genes of diffuse large B-cell lymphoma
Source: publisher site journal article supplement (doi:10.18632/aging.203587), 2021-10-05
Supplement: Supplementary file [file aging-v13i19-203587-supplementary-material-SD1.pdf]

**SUPPLEMENTARY FIGURES**

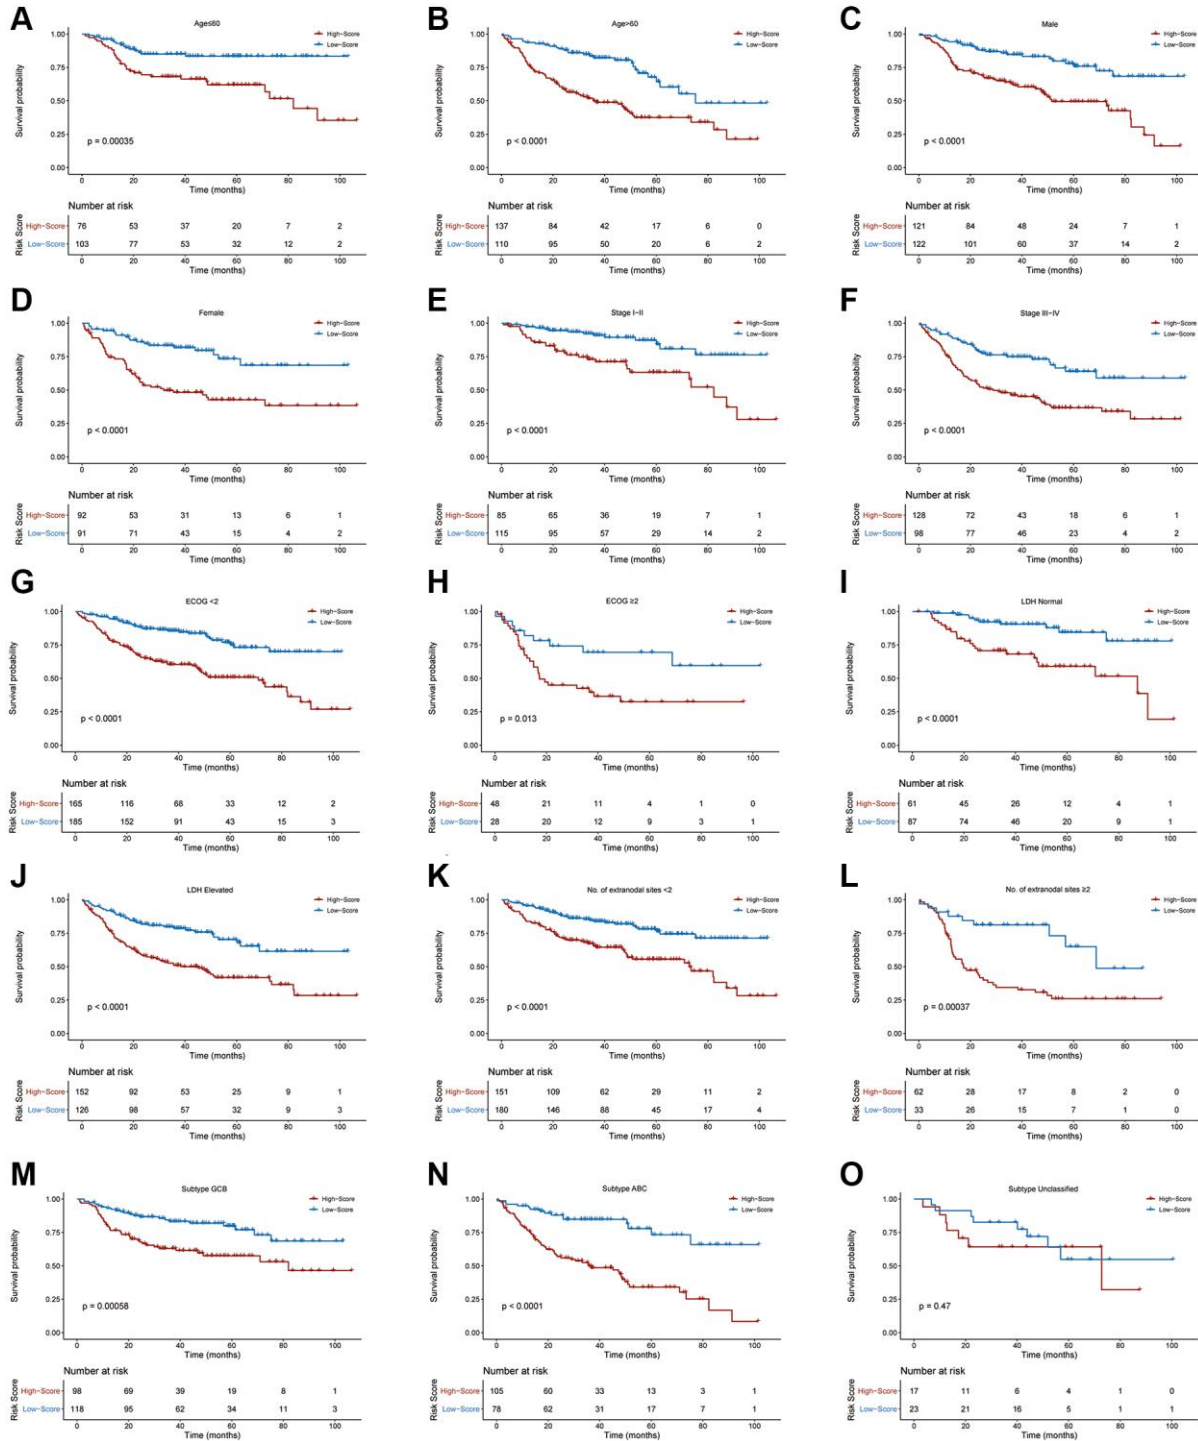

**Supplementary Figure 1. Stratification analyses of overall survival between high- and low-risk patients in different subgroups. (A) Age  $\leq$  60. (B) Age  $>$  60. (C) Male. (D) Female. (E) Stage I-II. (F) Stage III-IV. (G) ECOG  $<$  2. (H) ECOG  $\geq$  2. (I) LDH Normal. (J) LDH Elevated. (K) Number of extranodal sites  $<$  2. (L) Number of extranodal sites  $\geq$  2. (M) Subtype GCB. (N) Subtype ABC. (O) Subtype Unclassified.**

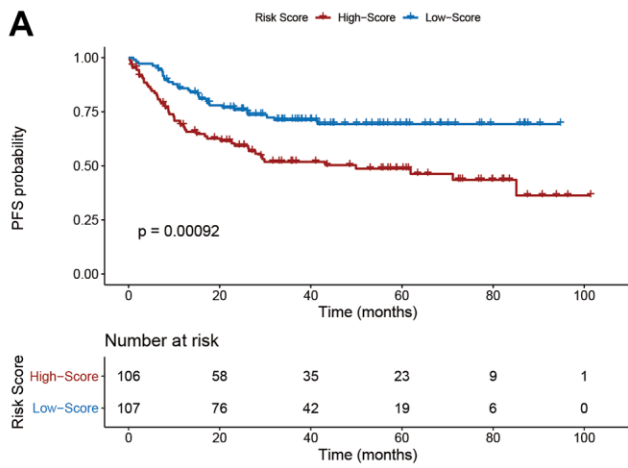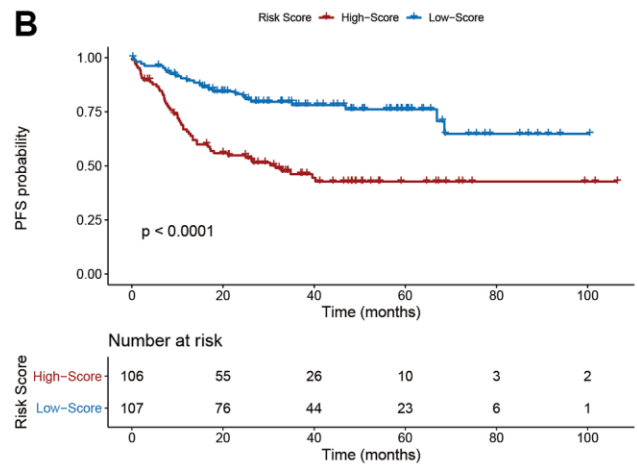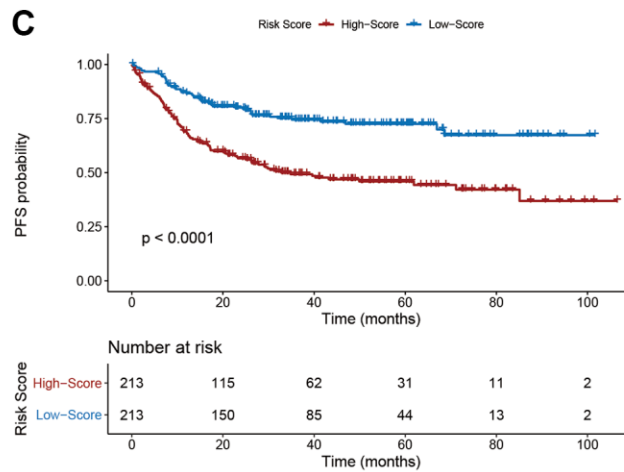

**Supplementary Figure 2. Kaplan-Meier plots of progression-free survival between high- and low-risk patients. (A) Discovery cohort, (B) internal validation cohort, (C) entire GSE31312 cohort.**
